# Supplementary material
Source: Springer Nature journal article supplement (https://www.springermedizin.de/resource/supplementary/13014_2006_46_MOESM1_ESM.pdf/9632796)

# 1A

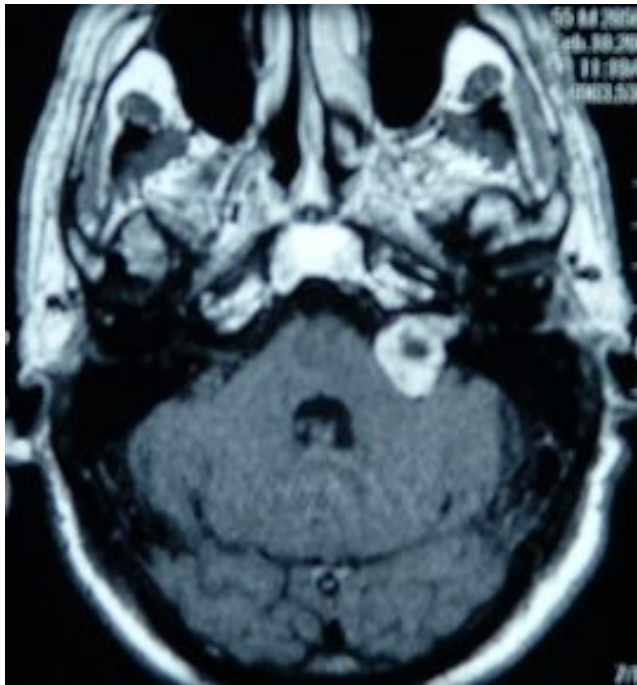

# 1B

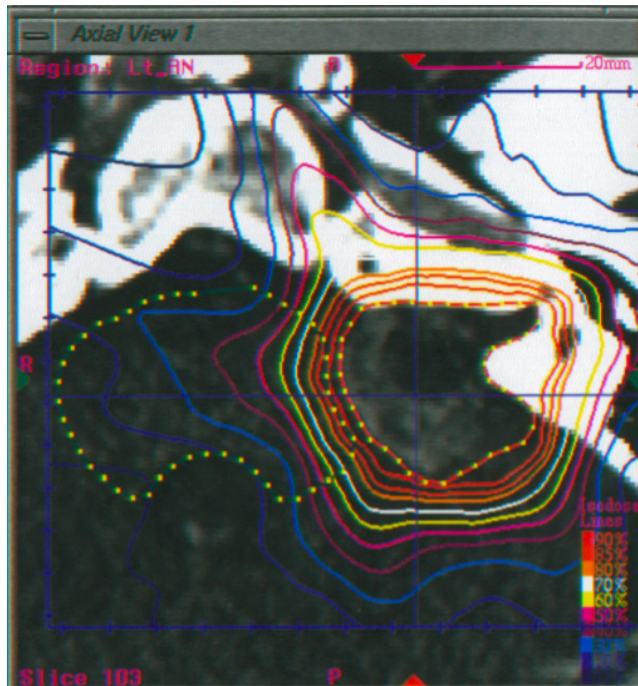

Supplement: MOESM1 [file 9632796]
